# Supplementary material for: Unveiling the Crucial Role of Ferroptosis in Host Resistance to Streptococcus agalactiae Infection
Source: Research Square preprint supplement (doi:10.21203/rs.3.rs-4121017/v1), 2024-04-18
Supplement: Supplementary file 1 [file 8b6275fc329721362f0a6ac9.xlsx]

## Sheet: Sheet1
	Primer
F1	FTH	5’-GCGTCTCCCTCGCAAGTG-3’
R1	FTH	5’-GGCATACAACTCCAGGTTGATCT-3’
F1	FTL	5’-CTGCATGCCCTGGGTTCT-3’
R1	FTL	5’-GATAGTGGCTTTCCAGGAAGTCA-3’
F1	FPN	5’-TCTTGTGTGTGATCTCCGTATTCA-3’
R1	FPN	5’-GAACGGATATCTTCAAATGGAGAAA-3’
F1	GAPDH	5’-CATGGCCTTCCGTGTTCCTA-3’
R1	GAPDH	5’-GCGGCACGTCAGATCCA-3’
F1	LPCAT3	5’-GGATGCCTGTGCCAACATG-3’
R1	LPCAT3	5’-GGCGATGGTGCCATTGA-3’
F1	ALOX15	5’-TCAGGCTTGCCACTTCATCAC-3’
R1	ALOX15	5’-CTGGCCAAGATGGATGGAA-3’
F1	ACSL4	5’-CCAAAGAACACCATTGCCATT-3’
R1	ACSL4	5’-AAGTCTGTGCTGCAATCATCCA-3’
F1	SLC7A11	5’-CGGATCAGGCATCTTCATCTC-3’
R1	SLC7A11	5’-CCACGCTGCCCGTGTT-3’
F1	GPX4	5’-GCTGTGCGCGCTCCAT-3’
R1	GPX4	5’-CCATGTGCCCGTCGATGT-3’
F1	PTGS2	5’-CAGCCAGGCAGCAAATCC-3’
R1	PTGS2	5’-ACATTCCCCACGGTTTTGAC-3’
